# Supplementary material for: Mapping QTL for Root and Shoot Morphological Traits in a Durum Wheat × T. dicoccum Segregating Population at Seedling Stage
Source: Int J Genomics. 2017 Aug 6;2017:6876393. doi: 10.1155/2017/6876393 (PMC5563412; doi:10.1155/2017/6876393)
Supplement: Supplementary file 1 — Table1. Literature sources used in the meta-analysis of quantitative trait loci for root traits. Table S2: ANOVA. Analysis of variance (mean square values) for shoot and root traits of 138 durum wheat genotypes. Table correlations1. Simple Pearson's correlation coefficient (r) of shoot and root traits of 138 durum wheat genotypes. [file 6876393.f1.xls]

## Sheet: Foglio1
Table1. Literature sources used in the meta-analysis of quantitative trait loci for root traits
Total No QTL	QTL number used in meta-analysis	Mapping population	Population size	Population type	Root trait	Reference
3	2	Jennah Khetifa x Cham 1	110	RIL	RDW, PVRN	Kubo et al. 2007
47	8	Chuan 35050 x Shannong 483	131	RIL	ARN, RDW,MRL	Guo et al. 2012
7	1	U24 x Ayahikari	103	DH	DRR	Hamada et al. 2012
32	2	Devon x Syn084	177	BC2F4:6	FRK, TIP, RV, SRA, TRL	Ibrahim et al. 2012
35	11	Xiaoyan 54 x Jing 411	142	RIL	MRL, PRL, LRL, TRL, RN, PRE	Ren et al. 2012
31	6	Avalon x Cadenza	199	DH	TRSA, SASA, TRV, SAV, RDW, TRL, SAL, SLL, SLSA, SLV	Bai et al. 2013
12	2	SeriM82 x Hartog	184	DH	RN	Christopher et al. 2013
46	3	Hanxuan 10 x Lumai 14	150	DH	MRL, SRN, TRL, PRA, RSA, SRA	Liu et al. 2013
4	1	W7984 x Opata85	112	RIL	RDW	Yu and Chen 2013
2	0	SHW-L1 x Chuanmai 32	171	RIL
22	1	Weimai 8 x Luhoan 2	229	RIL	RL, RN, RDW	Zhang et al. 2013
7	0	Weimai 8 x Yannong 19	302	RIL
8	7	Creso x Pedroso (CP)	123	RIL	T, L, SA,V	Petrarulo et al. 2015
48	20	Colosseo x Lloyd	176	RIL	TRL, TRV, SL, LRN, TRD, RT6, TRN, RDW, SDW, RSR, RGA	Maccaferri et al. 2016
81	36	Meridiano x Claudio	181	RIL	TRS, TRV, TRL, ARL, TRN, RT6, LRN, TRD, PRD, SL, SDW, PRV, PRL, PRS, RGA, RDW
RDW: Root Dry Weight
PVRN: Number of Roots Penetrating the PV disc
ARN: Number of axial roots
MRL: Maximal Root Length
DRR: Deep Root ratio
FRK: Number of Root Forks
TIP or RN or T: Number of Root Tips
RV or TRV or V or PRV: Root Volume
SRA or TRSA or RSA or SA or TRS: Surface Root Area
TRL or L: Total Root Length
PRL: Primary Root Length
LRL: Lateral Root Lenght
PRE: Primary Root Elongation
SASA: Seminal Axes Surface Area
SAV: Seminal Axes Volume
SAL: Seminal Axes Length
SLL: Seminal Laterals Length
SLSA: Seminal Laterals Surface Area
SLV: Seminal Laterals Volume
SRN: Seminal Root Number
PRA: Project Root Area
SRA: Seminal Root Angle
RL: Longest Root Length
ARL: Average Root Length
TRN: Total Root Number
LRN: Lateral root number per primary root
SL: Shoot length
TRD: total root diameter
Rt6: Presence of the sixth asymmetric seminal root seminal root
SDW: Shoot dry weight
RSR: Root to shoot ratio
PRD: Primary root diameter
