# Supplementary material for: Mapping QTL for Root and Shoot Morphological Traits in a Durum Wheat × T. dicoccum Segregating Population at Seedling Stage
Source: Int J Genomics. 2017 Aug 6;2017:6876393. doi: 10.1155/2017/6876393 (PMC5563412; doi:10.1155/2017/6876393)
Supplement: Supplementary file 2 [file 6876393.f2.xlsx]

## Sheet: Foglio2
Genotype	Genotype code	DAS†	Shoots	SH	LDW	RDW	D	F	C	L	L1	L2	L3	L4	L5	L6	L7	L8	L9	L10	SA	SA1	SA2	SA3	SA4	SA5	SA6	SA7	SA8	SA9	SA10	V	V1	V2	V3	V4	V5	V6	V7	V8	V9	V10	T	T1	T2	T3	T4	T5	T6
1	2	4	6	5			12	15	16	10	17	18	19	20	21	22	23	24	25	26	11	27	28	29	30	31	32	33	34	35	36	13	37	38	39	40	41	42	43	44	45	46	14	47	48	49	50	51	52
RIL001	1	28.75	1	66.7	281.075	34.4	0.28505	4254.25	2214.75	1050.39	979.816	62.3914	3.09437	0.60595	0.24145	0	0	0	0	0	83.1142	52.4378	11.5057	1.08787	0.310675	0.1561	0	0	0	0	0	0.5425	0.267475	0.17515	0.0308	0.01275	0.008025	0	0	0	0	0	2013.5	2005.75	5.75	1.25	0.25	0.25	0
RIL002	2	29.25	1.75	65	204.575	37.875	0.294025	4190.75	2012	1047.63	964.635	74.3368	4.09455	0.353975	0.1868	0.068075	0.04615	0	0	0	87.6426	53.2686	13.9303	1.44765	0.188475	0.1291	0.056175	0.044875	0	0	0	0.60225	0.280325	0.2159	0.041275	0.008025	0.007125	0.003675	0.003475	0	0	0	1890	1878.5	10	1	0.25	0.25	0
RIL003	3	34	1.5	65.975	225.1	31.75	0.2691	4165.75	2061.5	1114.76	1055.03	51.5195	2.47837	0.5318	0.25325	0.065675	0.0607	0.031675	0.01135	0	84.8233	55.8674	9.48153	0.884725	0.27595	0.168875	0.057625	0.060825	0.03745	0.0149	0	0.5285	0.2812	0.144125	0.025425	0.01145	0.008975	0.004025	0.00485	0.003525	0.00155	0	2159.75	2154.5	5	0.25	0	0	0
RIL004	4	28.25	1.5	60.25	261.725	40.575	0.2489	5275.5	2750.25	1449.48	1392.18	49.4201	2.6527	0.27915	0.0868	0.17715	0.025725	0.02375	0.0255	0.031525	108.921	73.741	9.08038	0.94075	0.137225	0.05955	0.148275	0.024825	0.028375	0.033525	0.05525	0.661	0.368375	0.137525	0.026875	0.005375	0.00325	0.0099	0.0019	0.0027	0.0035	0.0077	2216	2209	6.5	0.5	0	0	0
RIL005	5	26.75	1	58.025	218.3	22.8	0.252175	2041.25	778.5	709.463	667.881	36.2256	2.38135	0.31435	0.082175	0.075225	0	0.023225	0.021375	0.0182	56.2297	36.1995	6.68585	0.8433	0.167675	0.0565	0.061925	0	0.0259	0.0281	0.026825	0.37575	0.18595	0.101775	0.02405	0.00715	0.0031	0.004075	0	0.0023	0.002925	0.00315	1389.5	1384.25	5	0.25	0	0	0
RIL006	6	31.75	1	63.7	226.725	23.45	0.2763	1950.75	810	732.691	689.992	37.8738	1.49818	0.373025	0.014775	0.00685	0	0	0	0	61.1075	40.5069	6.718	0.5375	0.194025	0.0106	0.005475	0	0	0	0	0.41525	0.228625	0.097925	0.0156	0.00805	0.0006	0.00035	0	0	0	0	1277	1272.25	4.25	0.25	0.25	0	0
RIL007	7	23.75	2	37.7	125.125	13.525	0.297825	994	374.5	377.218	343.083	30.0449	1.8088	0.3393	0.14405	0.056475	0.027975	0	0	0	33.8834	20.0896	5.3869	0.638025	0.174025	0.1001	0.046675	0.02785	0	0	0	0.2515	0.11465	0.079625	0.0181	0.00715	0.005525	0.003075	0.0022	0	0	0	679	674	4	1	0	0	0
RIL008	8	29.5	1.25	60.025	241.925	48.525	0.276125	5262	2727	1358.91	1265.42	82.5562	5.47245	0.5611	0.17605	0.119	0	0	0	0	114.022	71.0405	15.6075	1.9145	0.279475	0.11835	0.098275	0	0	0	0	0.7815	0.379825	0.244325	0.05395	0.0111	0.00635	0.006475	0	0	0	0	1999.75	1995	4.75	0	0	0	0
RIL009	9	30	1.25	58	175.05	66.95	0.2264	3858	2010.25	1054.19	1007.85	39.713	1.71685	0.1929	0.082825	0.019725	0	0	0	0	75.7587	51.0393	7.40615	0.593025	0.104125	0.057525	0.01655	0	0	0	0	0.43325	0.241375	0.113675	0.01645	0.0045	0.0032	0.0011	0	0	0	0	1965	1959.5	4.75	0.5	0	0	0
RIL010	10	24.75	1.25	60.05	243.975	93.975	0.29325	6145.75	2939.5	1468.01	1354.21	97.3588	8.54905	0.8232	0.35565	0.08415	0.088125	0.0203	0	0	122.468	73.692	18.6359	2.99785	0.4245	0.2368	0.071925	0.087475	0.02315	0	0	0.8375	0.382025	0.295175	0.0846	0.0175	0.012575	0.004925	0.006925	0.0021	0	0	2623.5	2613.5	7.5	1.75	0.25	0	0
RIL011	11	31.75	1.25	71.175	335.975	70.15	0.27655	9710	5209.75	1943.96	1807	118.901	9.32782	0.861075	0.232425	0.014775	0.033775	0	0	0	160.848	98.8325	22.8224	3.26435	0.44315	0.155675	0.012675	0.036325	0	0	0	1.08275	0.5148	0.362925	0.09195	0.01825	0.008325	0.000875	0.0031	0	0	0	3188	3177.75	9.25	0.5	0	0.25	0
RIL012	12	22.75	1.5	44.7	139.475	22.725	0.264275	2147	1005.25	737.409	701.968	31.187	1.3565	0.199575	0.04065	0.0182	0	0	0	0	58.9101	39.4126	5.74585	0.475825	0.102225	0.02765	0.0145	0	0	0	0	0.38025	0.21205	0.087325	0.013425	0.004175	0.0015	0.000925	0	0	0	0	1180.5	1177.25	3.25	0	0	0	0
RIL013	13	25.75	1.25	67.65	259.175	55.225	0.297575	6698.25	3378	1476.74	1339.3	118.131	10.6341	1.56597	0.628625	0.261125	0.111125	0	0	0	131.303	75.5489	22.641	3.75082	0.810875	0.415875	0.2219	0.109525	0	0	0	0.9585	0.40715	0.3595	0.106525	0.033575	0.021925	0.01505	0.0086	0	0	0	2207.25	2193	11.5	1.25	0.5	0.25	0.25
RIL014	14	25.25	1	58.75	292.85	54.9	0.28185	6994.25	3354.25	1671.46	1547.88	103.374	10.4692	1.47055	0.485925	0.08205	0.0372	0	0	0	141.209	86.192	19.6776	3.6853	0.756075	0.323125	0.071025	0.0376	0	0	0	0.967	0.458525	0.3107	0.104475	0.031125	0.017125	0.0049	0.003025	0	0	0	2889.5	2876.75	11.75	1	0	0	0
RIL015	15	28.25	1.25	64.675	369.9	84.275	0.24925	9717.25	4929.5	2081.11	1974.79	91.691	5.9971	0.443725	0.04305	0.025075	0	0	0	0	161.439	105.242	17.358	2.09333	0.2232	0.027725	0.0205	0	0	0	0	0.9995	0.530325	0.2719	0.05885	0.008975	0.001425	0.001325	0	0	0	0	3179.5	3169.5	9.25	0.5	0	0	0
RIL019	16	25	1.25	60.825	207.875	41.975	0.303	4659.75	2155.75	1173.18	1057.77	101.502	8.05118	1.45142	0.659275	0.17205	0	0	0	0	105.163	60.231	19.0916	2.81805	0.75315	0.433775	0.14525	0	0	0	0	0.76025	0.329175	0.297375	0.079525	0.031275	0.022775	0.0098	0	0	0	0	1813.5	1804	7.75	1.25	0	0	0
RIL020	17	22.75	1	52.075	194.725	44.95	0.256825	5493.5	2769.75	1430.95	1362.34	61.3512	2.57662	0.16305	0.033775	0.0992	0	0	0	0	112.895	74.8544	11.4355	0.893375	0.082875	0.0226	0.082525	0	0	0	0	0.71375	0.391125	0.176025	0.024925	0.003375	0.0012	0.0055	0	0	0	0	1997	1992	4	0.75	0	0	0.25
RIL022	18	28.25	1.5	64.4	287.575	71.725	0.316775	7866	3874.5	1776.37	1578.16	174.095	16.2569	1.57795	0.477875	0.282675	0.050375	0	0	0	168.06	92.4983	32.8521	5.66245	0.810975	0.3251	0.234225	0.048675	0	0	0	1.29325	0.521225	0.51275	0.158625	0.033325	0.017675	0.015475	0.003725	0	0	0	2315.75	2295.5	18.25	1.75	0	0.25	0
RIL023	19	25.75	1	58.175	220.075	49.975	0.261075	7351.5	3751.5	1529.99	1424.52	89.8126	7.6499	1.23723	0.33225	0.0364	0	0	0	0	124.378	76.6197	17.1069	2.6887	0.6476	0.225025	0.029	0	0	0	0	0.80875	0.391775	0.26985	0.076225	0.027125	0.012175	0.00185	0	0	0	0	2692.75	2685.25	6.25	0.5	0	0.25	0
RIL026	20	28	1	57.675	209.65	53.425	0.257925	5599.75	2713.5	1392.46	1293.37	88.6074	4.7394	0.635325	0.194175	0.004475	0	0	0	0	114.761	71.857	16.3249	1.699	0.33575	0.126475	0.003575	0	0	0	0	0.754	0.381625	0.24795	0.04915	0.014175	0.00655	0.000225	0	0	0	0	2248.5	2238.5	9	0.25	0.5	0	0
RIL027	21	26.25	1.5	61.825	240.125	60.525	0.27665	7877.25	3967	1720.64	1584.14	119.697	8.9701	1.18462	0.110275	0	0.09415	0	0	0	145.861	87.9083	22.638	3.14433	0.604425	0.07525	0	0.09545	0	0	0	1.01225	0.466775	0.35425	0.08875	0.02465	0.0041	0	0.007725	0	0	0	2932.75	2919.75	12.25	0.25	0.25	0	0
RIL029	22	23.5	1.25	60.5	293.775	58.625	0.283775	6981.75	3057.75	1574.52	1434.97	116.294	12.9003	2.36745	0.605175	0.142075	0.05255	0.048525	0	0	140.395	81.3001	22.2864	4.57875	1.24242	0.4071	0.1257	0.051025	0.056125	0	0	1.013	0.44205	0.35445	0.130975	0.052175	0.021875	0.00885	0.00395	0.005175	0	0	2911.5	2896	14.25	1	0.25	0	0
RIL030	23	27.75	1.5	60.775	282.925	68.725	0.2985	7915.25	3736.75	1809.51	1620.85	164.191	14.8401	2.34068	0.511325	0.235875	0.0628	0.029825	0.01925	0	169.32	94.9652	31.1574	5.23327	1.18735	0.3456	0.197025	0.0611	0.03325	0.026475	0	1.28625	0.533725	0.490025	0.14865	0.048175	0.018675	0.01315	0.004725	0.00295	0.0029	0	2600.25	2586.5	13.25	0.5	0	0	0
RIL031	24	25.25	1.75	60.6	246.925	53.425	0.269475	6037.75	2869	1461.29	1364.31	85.4665	5.06192	0.46595	0.22675	0.2074	0.1193	0	0	0	122.594	76.2733	16.0027	1.74913	0.2394	0.1556	0.17715	0.1177	0	0	0	0.81925	0.407275	0.247575	0.04865	0.00985	0.00855	0.0121	0.00925	0	0	0	2439.5	2430.75	7	0.25	0.25	0.25	0.25
RIL032	25	28.25	1.5	58.525	236.525	42.1	0.2909	4509	1911	1176.73	1085.94	79.4188	5.87862	0.6996	0.2385	0.08155	0	0.0224	0	0	103.044	62.1043	14.992	2.0541	0.365825	0.1589	0.069275	0	0.025	0	0	0.73175	0.3386	0.234275	0.0577	0.0153	0.008425	0.004725	0	0.002225	0	0	1805	1796.75	8	0	0.25	0	0
RIL035	26	24	1.25	42.125	180.15	44.85	0.2918	4572.5	2067.5	1226.43	1126.02	89.8928	5.3836	0.56875	0.116175	0.07225	0	0	0	0	107.005	64.163	16.8522	1.86333	0.30075	0.074825	0.0628	0	0	0	0	0.751	0.349725	0.261	0.05185	0.012725	0.00385	0.00435	0	0	0	0	1609	1602.75	5.5	0.5	0	0	0
RIL037	27	22.5	1.25	40.325	158.95	24.6	0.294175	1922.25	796.25	704.172	646.731	51.6216	2.53595	0.6654	0.0847	0.1024	0	0.029575	0	0	62.7311	38.1855	9.4746	0.884425	0.348975	0.057475	0.088025	0	0.032975	0	0	0.45325	0.21655	0.1436	0.02485	0.0146	0.0031	0.006025	0	0.002925	0	0	1022.5	1017	4.5	1	0	0	0
RIL038	28	29.5	1.25	59.075	322.325	79.7	0.295	8013	3928.25	1795.82	1644.21	132.486	10.826	1.54862	0.372725	0.053325	0.010025	0	0	0	157.457	92.9574	25.1626	3.8279	0.8141	0.245075	0.044275	0.009575	0	0	0	1.12525	0.5028	0.395925	0.10905	0.03425	0.012875	0.002925	0.000725	0	0	0	2547	2533	12	1.25	0.5	0.25	0
RIL040	29	24.5	1	55.4375	225.525	45.1	0.294225	4432.75	1953	1162.39	1067.64	82.8956	5.86352	1.00575	0.41405	0.2735	0.131925	0.0694	0.095425	0.028225	101.992	61.1494	15.5349	2.06453	0.52335	0.272125	0.22695	0.1326	0.080775	0.12375	0.041125	0.7235	0.33575	0.24115	0.058525	0.0218	0.014275	0.015	0.0106	0.007475	0.012775	0.004775	2029.75	2019.75	9.75	0.25	0	0	0
RIL043	30	19.75	2	36.175	127.925	21.425	0.309275	1351.5	501.5	540.228	483.616	53.2672	1.6262	0.1338	0.023175	0.00685	0	0	0	0	51.3199	30.1771	9.42192	0.567475	0.06775	0.016625	0.006	0	0	0	0	0.392	0.182825	0.136475	0.015975	0.002725	0.00095	0.000425	0	0	0	0	720.5	714	6.5	0	0	0	0
RIL048	31	26.75	1.25	53.05	226.675	50.1	0.2823	5942.25	2760	1404.19	1297.99	93.0565	7.38765	0.958475	0.11635	0.026125	0	0	0	0	120.532	72.7602	17.7101	2.5765	0.49915	0.079175	0.02185	0	0	0	0	0.82875	0.3879	0.2789	0.07225	0.0208	0.0043	0.00145	0	0	0	0	1869.25	1858.5	9.5	0.5	0.25	0.25	0.25
RIL049	32	28.25	1	55.325	189.675	33.2	0.2803	3494.5	1428.25	1002.12	932.006	62.0295	4.18792	0.480975	0.068	0.2709	0.053	0	0	0	86.4586	53.0633	11.6514	1.44677	0.2504	0.04615	0.224025	0.052325	0	0	0	0.601	0.28795	0.181125	0.040175	0.010425	0.002475	0.014775	0.004125	0	0	0	1567.75	1559.5	7.5	0.75	0	0	0
RIL050	33	27	1.25	66.875	329.6	55.7	0.305975	5671.25	2357.75	1433.29	1288.63	126.791	10.2494	1.17738	0.473825	0.22285	0.0902	0.0518	0	0	133.977	75.507	24.0119	3.62195	0.61695	0.3218	0.18895	0.086775	0.059425	0	0	1.01575	0.422925	0.37665	0.1031	0.025875	0.01745	0.012775	0.00665	0.005425	0	0	2033.5	2018.5	14	0	0.25	0	0
RIL052	34	30.5	1	59.45	233.95	56.6	0.2939	7193	3310.25	1615.5	1475.1	119.501	11.3675	2.27727	0.625525	0.2574	0.120325	0.043	0	0	145.837	83.6261	23.0104	4.01145	1.16673	0.418175	0.213025	0.118875	0.050825	0	0	1.056	0.45345	0.367475	0.114	0.047825	0.022325	0.014075	0.00935	0.004775	0	0	2571.25	2560.25	10.5	0.5	0	0	0
RIL054	35	22.75	1	36.55	141.35	27.45	0.29565	1910.25	734.75	684.604	624.499	54.2696	2.41967	0.2248	0.0871	0.072725	0.039825	0.00685	0.014775	0	62.5315	37.8371	10.0148	0.839575	0.11965	0.0564	0.06505	0.042825	0.0082	0.019425	0	0.461	0.219325	0.15255	0.02345	0.005125	0.002925	0.004625	0.003675	0.000775	0.002025	0	1129.75	1121.25	8.25	0	0	0.25	0
RIL055	36	28	1.75	62.625	276.2	66.45	0.295	6549.75	2980.75	1603.78	1453.89	130.788	10.615	2.16578	0.6406	0.185775	0.0145	0	0.014775	0	143.16	81.5685	25.2478	3.68835	1.12345	0.428125	0.1522	0.01385	0	0.018825	0	1.0355	0.43685	0.404125	0.103175	0.046625	0.022825	0.00995	0.00105	0	0.0019	0	2458.5	2446.75	9.25	2.5	0	0	0
RIL056	37	24.75	1	42.675	200.675	42.425	0.284975	4295.75	1861	1053.25	966.449	75.9166	5.62715	0.59855	0.330575	0.034575	0	0	0	0	92.4376	54.3267	14.2864	1.96258	0.311075	0.2205	0.0301	0	0	0	0	0.65375	0.291225	0.222375	0.055025	0.012925	0.011725	0.0021	0	0	0	0	1678.25	1668.75	8	1.25	0	0	0
RIL057	38	25	1.75	56.45	217.55	56.875	0.304525	6080.5	2715.75	1436.75	1307.07	114.403	8.7481	1.01523	0.232175	0.112125	0.083225	0.00685	0	0	129.728	74.8053	22.09	3.05898	0.516475	0.1645	0.093125	0.086625	0.00765	0	0	0.95225	0.4094	0.35375	0.0861	0.021	0.009325	0.00615	0.0072	0.000675	0	0	2015.25	2003.5	11.25	0.5	0	0	0
RIL059	39	23.75	1.5	57.6	221.675	48.75	0.33395	3549.5	1346.75	1071.87	909.308	145.408	10.7127	1.83758	0.378475	0.289425	0.1645	0.0351	0.01135	0.030325	111.155	55.3524	27.5458	3.8047	0.950275	0.259325	0.246225	0.167525	0.0394	0.0149	0.0435	0.942	0.3236	0.431475	0.10885	0.039325	0.0142	0.0167	0.0136	0.003525	0.00155	0.00495	1603.25	1586.75	14.25	1.75	0	0.25	0
RIL060	40	23	1.75	56.575	210.675	43.2	0.29335	4347.5	1954.75	1118.08	1019.15	89.1352	5.49657	0.5113	0.159375	0.035875	0.014775	0	0	0	100.7	59.4929	16.8028	1.92448	0.259575	0.1089	0.031175	0.014125	0	0	0	0.73175	0.334325	0.2621	0.05425	0.010525	0.00595	0.00215	0.001075	0	0	0	1557.75	1546.75	10.25	0.5	0	0	0
RIL061	41	22.25	2	51.5	172.2	25.65	0.281225	2066.5	850.25	745.026	683.128	57.1116	2.17405	0.18675	0.0723	0	0	0	0	0	64.6724	39.2375	10.4336	0.75415	0.09355	0.0473	0	0	0	0	0	0.45275	0.2168	0.156875	0.021025	0.003725	0.00245	0	0	0	0	0	1243	1233.75	8.75	0	0.25	0.25	0
RIL063	42	22.75	1.5	40.675	155.65	34.675	0.287175	3043.5	1361	912.209	831.406	73.0595	3.24275	0.225475	0.112675	0.05625	0.029275	0.07325	0.0306	0	77.2143	45.7657	13.6532	1.13482	0.11515	0.0774	0.0459	0.02995	0.0864	0.042125	0	0.535	0.2399	0.210475	0.032025	0.004725	0.004225	0.002975	0.00245	0.008125	0.004625	0	1693.75	1685	7.25	0.5	0.5	0	0
RIL067	43	27.25	1.25	44.85	176.675	44.225	0.28645	3837	1538	1137.08	1042.81	83.2432	5.4297	0.654925	0.3432	0.27335	0.1336	0.131125	0.07675	0	101.659	60.4296	15.5887	1.8969	0.334325	0.226925	0.224425	0.1321	0.1575	0.103775	0	0.73225	0.335425	0.2415	0.053325	0.013675	0.011975	0.0147	0.010425	0.015075	0.011175	0	1833	1823.5	8.25	1	0.25	0	0
RIL068	44	24.5	1.5	62.85	238.525	52.25	0.2915	5675	2478.5	1352.57	1228.13	110.12	7.7983	0.97455	0.434475	0.18705	0	0	0.05935	0	122.053	70.6158	20.7885	2.71727	0.501875	0.29055	0.159925	0	0	0.082625	0	0.8845	0.39015	0.3249	0.076225	0.020675	0.0155	0.0109	0	0	0.00915	0	2060.75	2046	14.5	0.25	0	0	0
RIL070	45	25.5	1	53.7	242.9	51.025	0.29305	5531.25	2365.25	1400.25	1277.35	106.709	8.5329	1.33613	0.525075	0.0575	0	0.025875	0.027175	0	125.975	73.0145	20.1286	3.03617	0.698425	0.3497	0.045775	0	0.03195	0.0357	0	0.925	0.3988	0.31425	0.08705	0.029225	0.0186	0.0029	0	0.00315	0.003725	0	2109.75	2100.75	8.75	0.25	0	0	0
RIL072	46	20.25	1.75	38.65	134.975	23.25	0.262975	1892.25	792	696.6	657.449	35.374	0.98655	0.232325	0.090525	0	0	0	0	0	57.3281	37.7602	6.35673	0.35165	0.12245	0.05785	0	0	0	0	0	0.37625	0.20955	0.093925	0.010075	0.005175	0.002925	0	0	0	0	0	1057.75	1052.25	5.25	0	0.25	0	0
RIL074	47	25	1.5	45.475	194.475	48.275	0.2811	4934.75	2106.25	1249.21	1144.07	93.3769	6.35053	0.567675	0.089425	0.05435	0	0	0	0	108.807	64.2379	17.4907	2.22222	0.295025	0.059925	0.0458	0	0	0	0	0.76375	0.345425	0.2709	0.062625	0.012275	0.0032	0.003075	0	0	0	0	2033.5	2019	13.25	0.75	0	0	0
RIL076	48	23.75	1.5	60.65	252.2	58.925	0.2918	7564.25	3776.5	1572.86	1444.96	111.929	8.48353	0.98165	0.2547	0.155975	0.077825	0	0	0	136.745	81.0543	21.2726	2.9748	0.5069	0.172925	0.1304	0.07625	0	0	0	0.95325	0.43425	0.334775	0.084025	0.020925	0.009375	0.008675	0.005925	0	0	0	2321.5	2311.75	9.25	0.25	0	0	0
RIL078	49	25.25	1.5	55.6	275	56.6	0.28305	6225.5	2750.75	1530.07	1408.08	107.694	6.3346	1.37807	0.317475	0.23275	0.013725	0	0	0	132.533	79.5931	20.1043	2.23382	0.7156	0.2095	0.193	0.013125	0	0	0	0.92475	0.432225	0.3102	0.063475	0.02975	0.011025	0.012775	0.001	0	0	0	2452.25	2440	11.75	0.5	0	0	0
RIL079	50	23	1.75	41.95	170.725	34.7	0.2672	3731	1568	1031.88	951.518	71.4564	4.00765	0.659875	0.306825	0.023725	0	0	0	0	87.8233	53.1054	13.1253	1.40648	0.34585	0.201325	0.01905	0	0	0	0	0.601	0.2863	0.1992	0.039725	0.014525	0.010525	0.001225	0	0	0	0	1814.25	1803.5	9.5	1	0.25	0	0
RIL080	51	28.75	1	66.025	311.8	83.8	0.27825	10134.2	4650	2086.67	1925.54	141.467	11.6167	1.05525	0.09705	0.03535	0	0	0	0	181.988	107.843	27.1797	4.06577	0.536275	0.0653	0.029875	0	0	0	0	1.264	0.576125	0.43265	0.1146	0.0218	0.003525	0.002025	0	0	0	0	2655.75	2640.5	14.25	0.25	0.5	0	0
RIL081	52	22.5	1.25	40.125	149.45	30.05	0.3003	2588.75	969.75	794.041	703.378	81.1254	4.71428	1.34278	0.541775	0.2299	0.11795	0.016625	0	0	75.5023	41.3851	14.9831	1.65372	0.7032	0.364675	0.18795	0.11595	0.0192	0	0	0.58425	0.2351	0.228425	0.046725	0.0295	0.0196	0.012225	0.0091	0.001775	0	0	1232	1220.75	9.75	1	0.5	0	0
RIL083	53	20.75	1.75	40.3	120.95	28.475	0.30585	2195	920.75	755.603	669.222	80.1199	3.7579	0.4092	0.15385	0.05065	0.00685	0.031675	0	0	71.7481	40.0396	14.8272	1.30412	0.2115	0.100075	0.043325	0.007375	0.0391	0	0	0.5515	0.231	0.2263	0.0364	0.00875	0.0052	0.002975	0.000625	0.00385	0	0	946	935.75	9.75	0.5	0	0	0
RIL088	54	25	1	61.4	275.525	67.925	0.278125	8056.25	3673	1747.99	1611.67	118.103	10.0312	1.2318	0.214125	0.02375	0.030275	0.036425	0	0.04985	152.264	90.7321	22.4724	3.53048	0.653725	0.146	0.01985	0.030675	0.044425	0	0.071475	1.05675	0.48895	0.354375	0.100075	0.027775	0.00795	0.001325	0.002475	0.004325	0	0.00815	2302	2290.5	11.25	0	0	0	0
RIL089	55	26	1.25	63.45	290.775	64.725	0.299625	6570.25	2790.5	1518.84	1371.43	123.774	14.1723	2.348	0.698925	0.21745	0.14075	0.149025	0.041925	0	142.176	80.1584	23.8509	5.0408	1.21367	0.4786	0.190675	0.14345	0.1751	0.05415	0	1.0665	0.450775	0.3817	0.144475	0.05015	0.0262	0.013325	0.011675	0.0164	0.005575	0	2348.75	2333.25	13.75	0.75	0.25	0.25	0
RIL090	56	21.25	1.25	41.125	137.2	29.2	0.286025	2260.75	897	793.917	723.24	64.2699	1.72487	0.238	0.0285	0	0	0	0	0	70.7982	42.85	11.7101	0.60155	0.1251	0.019825	0	0	0	0	0	0.5055	0.2424	0.175475	0.016875	0.00525	0.0011	0	0	0	0	0	1026.75	1020.25	6.25	0	0.25	0	0
RIL091	57	22.75	1.75	45.85	169.175	41.075	0.26865	4875.5	2171.25	1204.76	1123.27	72.8935	3.64197	0.3089	0.04405	0.01795	0.02665	0.063025	0	0	101.588	62.9194	13.625	1.26097	0.1656	0.03065	0.014275	0.025475	0.072025	0	0	0.6815	0.33705	0.210525	0.0351	0.0071	0.0017	0.0009	0.001925	0.00655	0	0	1750.5	1745.25	5.25	0	0	0	0
RIL094	58	27	1.25	61.5	366.75	106.575	0.2869	12172.8	5735.25	2233.96	2021.25	178.999	20.7381	3.74775	0.75115	0.15985	0.023475	0.013725	0	0	203.436	113.508	34.7678	7.34788	1.9325	0.504975	0.132375	0.022425	0.016675	0	0	1.48425	0.609475	0.560475	0.20965	0.079675	0.027075	0.00875	0.0017	0.0016	0	0	3037.5	3018.5	17.75	0.5	0	0.25	0
RIL095	59	22.75	2	58	299.325	69.7	0.3187	7162.75	2992.5	1613.3	1405.93	170.48	23.2297	5.2988	1.50433	0.546	0.072575	0.0162	0	0	162.692	81.4835	32.8359	8.3392	2.7912	1.00533	0.465025	0.073975	0.0185	0	0	1.32325	0.453125	0.525325	0.241375	0.117625	0.0536	0.0316	0.006	0.001675	0	0	2326.5	2309	16.25	0.5	0.75	0	0
RIL096	60	23.25	2	61.2	231.85	54.475	0.27925	5787.5	2468.25	1455.49	1337.97	105.077	5.74405	0.55255	0.13075	0.09395	0.0079	0	0	0	127.365	75.4353	20.0186	2.00848	0.27885	0.088475	0.077425	0.00755	0	0	0	0.88925	0.406525	0.315425	0.056575	0.011275	0.004775	0.005075	0.000575	0	0	0	2293	2281.25	11.25	0.5	0	0	0
RIL099	61	24.5	2	48.6	194.05	49.475	0.28605	6386.75	3093.5	1420.07	1295.97	106.879	10.4217	1.85695	0.38285	0.019	0.0066	0	0	0	126.367	73.2677	20.4374	3.68835	0.950525	0.256525	0.0163	0.0063	0	0	0	0.90275	0.39655	0.32375	0.105175	0.038925	0.013725	0.001125	0.000475	0	0	0	1969.75	1963.5	6	0.25	0	0	0
RIL101	62	25.5	1.75	59.925	319.375	86.05	0.327425	9393	4112.75	2013.93	1750.71	219.464	26.502	6.00802	2.01428	0.463375	0.174075	0.16965	0.098925	0	202.947	102.638	42.87	9.45342	3.13377	1.37025	0.39455	0.1785	0.2047	0.1308	0	1.654	0.5779	0.6951	0.271775	0.130775	0.074425	0.0268	0.0146	0.019675	0.013775	0	3020.25	2999.25	18.25	2.75	0	0	0
RIL102	63	26	1.5	53.575	275.35	90.875	0.289375	10951.2	5023.5	2168.65	1951.22	179.594	24.7446	3.94425	0.7004	0.14475	0.06015	0.054875	0	0	199.702	109.128	34.993	8.7761	2.02827	0.4643	0.12035	0.0595	0.06365	0	0	1.47475	0.584875	0.566425	0.25075	0.08345	0.02455	0.007975	0.0047	0.005875	0	0	3260.25	3242.75	16	1	0.5	0	0
RIL103	64	20.5	2	43	174.075	38.425	0.3027	3438.75	1433.25	1010.6	905.099	92.4221	7.75978	1.1579	0.54305	0.168625	0.121625	0.0483	0	0	95.035	53.0507	17.3237	2.73638	0.601175	0.360275	0.1406	0.118775	0.0564	0	0	0.7245	0.297525	0.268825	0.07775	0.02495	0.019075	0.00935	0.00925	0.00525	0	0	1270.5	1259.75	9.5	0.75	0	0.5	0
RIL105	65	25	1.75	53.525	259.625	56.25	0.2849	6733.25	2855	1688.54	1543.36	126.394	11.7289	1.32685	0.386275	0	0	0	0	0	153.261	89.3378	24.1167	4.10837	0.681725	0.257375	0	0	0	0	0	1.127	0.49515	0.381475	0.1159	0.028025	0.013675	0	0	0	0	0	2420	2406.5	12.5	0.5	0.25	0	0
RIL106	66	26	1.75	53.375	215.3	64.575	0.288125	7676.75	3416.5	1737.04	1584.18	131.938	12.6505	1.53127	0.169025	0.126925	0	0	0	0	155.551	89.772	25.0548	4.45865	0.788375	0.11395	0.102925	0	0	0	0	1.12875	0.4868	0.394225	0.12655	0.032475	0.006125	0.00665	0	0	0	0	2558	2548.5	9.25	0.25	0	0	0
RIL107	67	26.5	1.25	62.525	320.975	86.625	0.287075	11936.8	5753.25	2439.36	2223.64	186.236	18.5309	2.88965	0.347975	0.177025	0.0137	0	0	0	220.143	125.814	35.8242	6.5449	1.4952	0.2335	0.149225	0.0131	0	0	0	1.586	0.680825	0.571775	0.18625	0.061925	0.0125	0.01005	0.001	0	0	0	2998	2985	12	0.5	0.25	0	0
RIL113	68	22.5	1.75	58.5	279.85	69.95	0.3143	7452	3276.5	1659.25	1473.22	158.225	17.2901	3.43922	1.1944	0.38065	0.018075	0.013725	0.010025	0	161.002	85.5587	30.3768	6.15287	1.79812	0.80715	0.31985	0.019425	0.0153	0.013175	0	1.276	0.475825	0.483925	0.176525	0.07515	0.043525	0.021425	0.00165	0.00135	0.001375	0	2138	2123.75	13	0.25	0.5	0.5	0
RIL114	69	20.25	1.75	58.1	178.45	53.575	0.291625	4930	2246.75	1346.87	1202.15	131.515	7.05637	0.510075	0.13935	0.089325	0.074925	0	0	0	123.098	69.1543	24.1836	2.44013	0.26215	0.09245	0.07545	0.0746	0	0	0	0.897	0.3846	0.36705	0.067825	0.010775	0.0049	0.005075	0.005925	0	0	0	1846.5	1835.5	10.5	0.5	0	0	0
RIL115	70	22.75	1.5	55	221.675	71.9	0.30035	8108	3416.25	1774.05	1589.91	152.776	19.2303	3.31487	0.78565	0.253625	0.04985	0.0103	0	0	169.035	91.7514	29.386	6.8247	1.72142	0.52505	0.212825	0.050675	0.011475	0	0	1.28475	0.509425	0.469275	0.195125	0.071525	0.027975	0.01425	0.0041	0.001025	0	0	3162	3142.75	17.25	1.5	0	0	0.25
RIL117	71	27.25	1.25	57.275	272.675	96.2	0.289525	11447.8	5221.5	2266.71	2062.25	172.912	19.2756	3.07357	0.704625	0.338125	0.186525	0.0736	0	0	206.058	116.603	33.3703	6.80453	1.58385	0.47365	0.286275	0.181875	0.084025	0	0	1.491	0.6319	0.53485	0.193675	0.0652	0.025425	0.019325	0.01415	0.007625	0	0	3303.75	3289	14	0.5	0.25	0	0
RIL121	72	28.75	1.25	44.775	236.25	80.475	0.31205	7946.25	3194.5	1827.42	1632.88	167.886	16.73	2.45558	0.478325	0.051175	0	0	0	0	179.382	98.0316	32.5211	5.87672	1.2529	0.320575	0.0428	0	0	0	0	1.4025	0.562425	0.52285	0.1662	0.0511	0.017125	0.002875	0	0	0	0	2307.75	2286.5	18.75	2.5	0	0	0
RIL122	73	25.5	1.5	51.075	232.05	50.35	0.28265	6138.5	2748.75	1540.59	1423.17	102.991	7.70275	0.994975	0.0736	0.044075	0.035875	0.014775	0	0	134.01	80.7042	19.5932	2.69813	0.502175	0.050875	0.037475	0.03685	0.01665	0	0	0.95125	0.4363	0.3088	0.076125	0.02025	0.0028	0.002525	0.003025	0.0015	0	0	2312.75	2300.25	11	1	0	0.25	0
RIL124	74	23.25	1.75	50.825	170.275	40.7	0.32475	3140.25	1194	1047.4	898.015	133.505	10.5136	1.24	0.5098	0.141625	0.020575	0	0	0	108.502	55.5521	25.332	3.71635	0.636525	0.3477	0.1192	0.019675	0	0	0	0.9095	0.329075	0.398175	0.1058	0.026125	0.01895	0.008025	0.0015	0	0	0	1332.25	1321.75	8.5	1.75	0	0	0
RIL125	75	25.5	1.5	50.975	228.45	66.775	0.300825	7318	3250.5	1779.29	1607.29	149.426	13.6556	1.98565	0.4012	0.040075	0.00655	0.014775	0	0	164.768	93.6671	28.583	4.86498	1.01452	0.266025	0.034875	0.0068	0.016475	0	0	1.238	0.5228	0.4529	0.1397	0.04145	0.0141	0.002425	0.000575	0.00145	0	0	2375.25	2366.75	7.25	0.25	0.25	0.25	0
RIL126	76	21.5	2.25	56.45	206.65	41.125	0.31985	3561	1327.25	1090.76	951.097	124.158	10.4874	1.1502	0.30685	0.16385	0.0277	0	0	0	109.793	58.361	23.667	3.67285	0.59	0.2061	0.1378	0.026475	0	0	0	0.891	0.34255	0.373275	0.1036	0.0242	0.011075	0.00925	0.002025	0	0	0	1494	1483.25	9.25	1	0	0	0.25
RIL127	77	25.5	1.25	60.475	320.75	91.375	0.32875	10322	4561.25	2106.86	1841.13	217.936	31.1006	6.81292	1.7494	0.897725	0.229775	0.03405	0.013725	0	212.583	107.388	42.8322	11.1534	3.55085	1.18585	0.75145	0.23375	0.03875	0.018025	0	1.754	0.599975	0.698475	0.322375	0.1481	0.0642	0.050175	0.018975	0.003525	0.001875	0	2730	2714.5	13.5	1.25	0.25	0.25	0
RIL128	78	24.5	2	56.375	263.325	81.4	0.344175	7507	3049	1743.51	1488.52	214.348	26.4324	5.35797	1.50115	0.4483	0.1013	0.04325	0	0	183.884	89.732	41.6512	9.47315	2.77315	1.01753	0.383675	0.100725	0.0501	0	0	1.59525	0.51995	0.6713	0.273675	0.1148	0.055075	0.026225	0.008	0.004625	0	0	2451.5	2431	17.25	2.75	0.25	0	0
RIL130	79	23.5	1.75	58.625	282.2	72.15	0.323275	8291.25	3326.25	1860.86	1629.98	193.387	24.2143	4.36848	0.84445	0.3973	0.148075	0.037475	0	0	187.154	96.7865	37.7724	8.58047	2.2678	0.567275	0.337225	0.1423	0.043375	0	0	1.51375	0.55075	0.6124	0.24495	0.094175	0.030425	0.02285	0.010875	0.004	0	0	3189	3166.25	19	2.5	0.75	0	0
RIL131	80	21	2.25	49.275	220.85	47.775	0.313625	3885.25	1522	1167.99	1020.41	132.386	9.48292	0.8299	0.198425	0.00685	0.0372	0	0	0	115.314	61.9562	25.1052	3.2839	0.42745	0.1311	0.00575	0.0375	0	0	0	0.9235	0.360625	0.3942	0.091525	0.0176	0.0069	0.000375	0.003	0	0	0	1557	1543	12.75	1	0.25	0	0
RIL133	81	24.5	2.25	61.5	216	51.975	0.326	5507.5	2243	1466.08	1287.55	151.971	18.305	2.5688	0.574475	0.212175	0.07145	0.044475	0.024	0	148.286	78.5589	29.6271	6.4535	1.3308	0.39445	0.18335	0.074525	0.05305	0.031	0	1.21825	0.4582	0.4793	0.183175	0.05515	0.021625	0.01265	0.0062	0.00505	0.0032	0	1960	1945.75	12.75	1	0	0	0.25
RIL137B	82	24	2.25	56.85	228.425	76.275	0.322275	9747.75	4808.75	1919.36	1681.02	202.617	23.4735	3.61603	0.72925	0.25795	0.07045	0.047225	0	0	185.9	97.8539	39.2207	8.33035	1.84835	0.483275	0.2216	0.0678	0.055625	0	0	1.45175	0.54815	0.6299	0.238125	0.075525	0.025575	0.015175	0.005175	0.005225	0	0	2827.25	2812	14.25	0.5	0	0.25	0
RIL138	83	26	1.75	58.925	264.575	81.325	0.34405	9125.25	3679.5	1840.55	1576.14	199.502	38.8864	11.7801	4.82982	2.15772	0.50795	0.2828	0.069125	0.026125	199.018	92.0919	39.8517	14.0246	6.17213	3.26587	1.8249	0.503025	0.3307	0.092375	0.038475	1.80675	0.5166	0.661925	0.4079	0.25885	0.176325	0.12315	0.0397	0.030825	0.009825	0.0045	2696	2669.5	23	3.25	0	0	0
RIL139	84	21.25	2	57.625	228.075	51.825	0.315325	5227.25	2273.75	1461.29	1285.84	153.868	14.0308	1.94855	0.5789	0.0773	0.02165	0	0	0	144.082	78.1517	29.3847	4.94177	1.01077	0.389575	0.063575	0.021125	0	0	0	1.172	0.456275	0.4651	0.14025	0.04195	0.020925	0.004175	0.00165	0	0	0	2019.5	2009.25	9.25	0.75	0	0.25	0
RIL142	85	23.75	1.75	43.825	178.7	47.35	0.296225	4945	2171	1345.63	1227.1	104.751	8.1018	1.14982	0.242275	0.081	0.035075	0	0	0	121.151	70.7912	19.8559	2.84082	0.5858	0.162525	0.069675	0.034925	0	0	0	0.8845	0.389175	0.311275	0.080225	0.023875	0.008675	0.0048	0.002775	0	0	0	1768	1760.5	6.75	0.75	0	0	0
RIL144	86	20.5	2.25	51.25	199.575	51.9	0.3385	3799.25	1494	1227.82	1037.85	166.582	16.587	1.93048	0.708175	0.536175	0.25175	0.11165	0.010025	0.068575	130.187	64.1638	31.8743	5.93525	1.00113	0.470175	0.464675	0.25655	0.131675	0.013975	0.1051	1.1215	0.380775	0.505475	0.17115	0.041525	0.0249	0.03215	0.02085	0.012375	0.00155	0.012825	1501.5	1486.5	12.75	1	1	0.25	0
RIL145	87	22	2.25	54.575	202.625	38.65	0.32145	3526.75	1299.25	1049.38	917.912	112.176	12.6782	2.30975	0.430475	0.16545	0.16605	0.037475	0	0.01135	106.417	56.3117	21.6194	4.48998	1.21405	0.287	0.13865	0.166075	0.04225	0	0.016725	0.87825	0.331025	0.346	0.1281	0.05105	0.01525	0.009275	0.013225	0.0038	0	0.00195	1563.75	1552.25	11.25	0.25	0	0	0
RIL148	88	25.75	1.25	56.275	238.85	57.5	0.317625	5661.25	2322.5	1488.05	1318.99	143.484	15.5333	3.00035	0.83225	0.203275	0.146675	0.04725	0.035875	0.0203	145.631	78.6878	27.3947	5.57725	1.5696	0.5528	0.166475	0.152525	0.054575	0.046525	0.029125	1.15325	0.4505	0.4337	0.1615	0.0657	0.0293	0.010875	0.01265	0.005025	0.0048	0.003325	2283.25	2267.25	13.5	2.25	0	0.25	0
RIL149	89	24	2	53.7	184.75	39.825	0.31215	3670.75	1482.75	1121.13	981.69	121.633	10.9062	1.64165	0.63175	0.162375	0.0797	0.022175	0	0	108.426	57.8798	23.4524	3.86555	0.8485	0.42665	0.138225	0.078275	0.0256	0	0	0.85425	0.326525	0.3747	0.11045	0.0351	0.023025	0.0094	0.006125	0.00235	0	0	1746.5	1736.25	8.75	1.5	0	0	0
RIL150	90	24.5	2	61.575	270.275	64.875	0.325325	5706.5	2347.5	1563.97	1371.74	166.251	15.2782	3.04965	0.9943	0.25205	0.1459	0.1253	0	0	156.186	83.4765	31.507	5.41423	1.58388	0.662175	0.216475	0.14715	0.145575	0	0	1.27425	0.48915	0.494425	0.154675	0.06575	0.0352	0.01485	0.01185	0.013475	0	0	2193	2179.25	13	0.5	0.25	0	0
RIL151	91	23	1.75	50.15	188.5	42.675	0.293425	4185.25	1714.25	1214.68	1113.64	87.9579	7.85272	0.930375	0.301575	0.0446	0.0224	0	0	0	110.215	65.4494	16.5368	2.78543	0.4657	0.20315	0.035525	0.021425	0	0	0	0.80325	0.367825	0.2576	0.0796	0.018625	0.01095	0.00225	0.001625	0	0	0	1851.5	1838.25	11.5	1.5	0	0	0.25
RIL152	92	21.75	2.25	51.6	210.475	44.25	0.3322	4494.5	1751.25	1151.76	1013.02	114.908	15.1221	3.0821	0.962225	0.363625	0.140975	0.053	0	0	116.011	60.1529	22.6486	5.3924	1.59912	0.650675	0.31275	0.139775	0.0624	0	0	0.96075	0.339925	0.3706	0.154975	0.0664	0.0351	0.021425	0.01105	0.00585	0	0	1594.75	1582.5	11	1	0	0	0.25
RIL153	93	25.75	1.75	58.825	245.225	64.975	0.30555	8095.5	3430.5	1814.39	1632.06	156.324	17.1376	2.70493	0.400025	0.066725	0.079975	0	0	0	171.025	95.301	30.1479	6.07648	1.39567	0.269425	0.0555	0.0825	0	0	0	1.29925	0.53335	0.482225	0.173575	0.057625	0.014475	0.003675	0.006775	0	0	0	2633.75	2618.75	13.25	1	0.25	0.25	0.25
RIL154	94	25	1.5	46.475	198.15	40.7	0.3054	4669.5	1920.5	1204.83	1090.46	95.5389	11.1534	2.02038	0.982775	0.24145	0.1467	0.010025	0	0	113.363	63.0506	18.2043	3.98628	1.05907	0.673475	0.204225	0.14755	0.011175	0	0	0.868	0.34715	0.28795	0.1148	0.04445	0.03685	0.0138	0.01185	0.001	0	0	1584	1571	11.5	0.5	0.5	0.25	0
RIL156	95	26.25	2	59.325	280.175	88.475	0.360475	8557.5	3320	1808.37	1521.23	223.418	39.6085	10.8362	3.57872	1.79543	0.493475	0.256075	0.070975	0.023725	201.201	91.6677	44.0007	14.1901	5.6659	2.42393	1.5034	0.49245	0.29095	0.09415	0.034575	1.8215	0.531175	0.719525	0.40975	0.2371	0.131075	0.100475	0.0392	0.026325	0.009975	0.004	2991.75	2969.25	20.25	1	0.75	0	0
RIL158	96	24	2	61.875	251.35	62.5	0.32515	6353.5	2635.5	1546.97	1347.75	168.188	20.643	3.50725	0.61875	0.18985	0.2976	0	0.029275	0	155.094	79.2608	32.932	7.34935	1.80707	0.415725	0.162975	0.304225	0	0.038925	0	1.25825	0.44685	0.534975	0.21085	0.074475	0.0223	0.01115	0.024775	0	0.004125	0	2408.25	2393.5	12.75	1.5	0.5	0	0
RIL159	97	20.25	2.25	44.1	148.2	31.95	0.294675	2899	1248.5	948.176	862.591	76.5423	4.73335	0.484525	0.132025	0.189475	0.02005	0.003175	0	0	85.7906	50.7002	14.0741	1.6518	0.2494	0.08795	0.15405	0.0193	0.003525	0	0	0.627	0.287375	0.214075	0.04645	0.010275	0.004675	0.01	0.001475	0.000325	0	0	1240	1231	8.5	0.5	0	0	0
RIL160	98	22	2	43.2	165.675	32.65	0.31755	2575	1011.5	894.277	789.63	91.5496	8.18965	1.16935	0.4533	0.07125	0.0409	0	0	0	88.1837	48.4192	17.3017	2.89255	0.60135	0.29975	0.05675	0.043975	0	0	0	0.7045	0.284825	0.2707	0.0823	0.024725	0.0158	0.0036	0.00375	0	0	0	1262.25	1250.75	10.5	1	0	0	0
RIL161	99	27	1.5	45.675	168.9	46.6	0.326525	4557.5	1804.5	1297.24	1129.04	143.133	17.4171	2.77887	0.56055	0.161875	0.0496	0	0	0	131.01	67.3448	27.624	6.21828	1.45718	0.37325	0.135025	0.051175	0	0	0	1.06975	0.386175	0.442425	0.1789	0.061125	0.019825	0.009	0.0042	0	0	0	2106.25	2086.75	17	2	0	0.5	0
RIL163	100	25.25	1	54.2	183.025	38.975	0.311	3858	1609.75	1233.01	1103.48	113.687	9.71705	1.15913	0.350125	0.264175	0.1681	0.024275	0.013725	0	118.028	65.6264	21.7367	3.4392	0.59345	0.229375	0.224225	0.174125	0.028525	0.0183	0	0.93575	0.373325	0.3442	0.098075	0.0243	0.011975	0.0152	0.014375	0.002675	0.00195	0	1890.75	1874.5	15.5	0.5	0	0	0.25
RIL164	101	21.5	2.25	51.075	176.3	39.25	0.317975	3650	1310.75	1115.04	979.429	116.528	13.7341	1.79735	0.192875	0.048825	0.020325	0	0	0	114.289	61.2169	22.6428	4.87635	0.929275	0.1311	0.0398	0.02105	0	0	0	0.958	0.367125	0.364975	0.1395	0.0384	0.007125	0.0026	0.001725	0	0	0	1515.75	1501	13	1.25	0.25	0	0.25
RIL165	102	23.25	1	47.9	187	40.7	0.3254	3160.75	1181	1032.06	907.92	106.5	11.6595	1.97068	1.05892	0.283125	0.10765	0.11615	0.043775	0.013725	105.17	56.2263	20.3042	4.16737	1.03423	0.70925	0.2403	0.108025	0.136	0.05695	0.025125	0.9005	0.332825	0.321225	0.12	0.04345	0.037925	0.0163	0.008625	0.0127	0.0059	0.003675	1353.5	1343	9.25	0.75	0.25	0.25	0
RIL166	103	27.25	1.25	55.1	239.775	54.3	0.340425	6282	2216	1625.91	1398.37	191.752	24.6945	4.39558	0.87845	0.042975	0.05645	0.016375	0	0	173.261	85.8603	37.3443	8.7975	2.26273	0.584575	0.03505	0.055175	0.01825	0	0	1.478	0.505625	0.604275	0.2526	0.09315	0.03105	0.002275	0.0043	0.001625	0	0	2481	2458.5	19.5	2.5	0.25	0.25	0
RIL167	104	25	1.25	48.175	172.425	33.125	0.317775	2370.75	955.25	892.243	787.41	94.9196	6.2543	0.77065	0.19365	0.078975	0.0103	0	0	0	89.3252	50.0965	17.4867	2.21197	0.397025	0.1285	0.066925	0.009825	0	0	0	0.73075	0.30675	0.26635	0.063	0.016375	0.0068	0.004525	0.00075	0	0	0	1119	1110.25	7.5	1.25	0	0	0
RIL170	105	20.5	2	47.85	171.3	38.425	0.363775	3032.25	1005	918.309	767.772	129.589	14.8036	2.4531	1.01473	0.17805	0	0	0	0	103.08	49.5249	24.8271	5.26722	1.28375	0.68395	0.14465	0	0	0	0	0.94375	0.30365	0.394425	0.151	0.05375	0.036775	0.00935	0	0	0	0	1113.5	1100.5	11.75	1	0.25	0	0
RIL172B	106	26	1.5	45.275	191.725	43.55	0.333775	4359	1617.25	1234.51	1066.02	143.988	16.4425	3.19325	0.562275	0.196275	0.05355	0	0	0	128.558	64.811	27.737	5.83007	1.67013	0.3718	0.16685	0.052875	0	0	0	1.0915	0.379875	0.443425	0.1665	0.06985	0.019625	0.011325	0.004175	0	0	0	1850.25	1835.25	13.25	1	0.25	0	0.25
RIL174	107	25.75	1.75	50.65	183.425	38.7	0.331025	3307.5	1305.75	1099.48	958.286	122.74	12.4878	1.75063	0.7305	0.1073	0.1476	0.045375	0	0	115.516	61.3222	23.3094	4.4821	0.9109	0.4903	0.08925	0.15045	0.05205	0	0	0.981	0.376825	0.36705	0.12965	0.037925	0.026225	0.005925	0.012225	0.00475	0	0	1451.5	1436.25	13.75	1.25	0.25	0	0
RIL177	108	28.75	1	43.8	175.05	46.175	0.325225	4679	1798	1299.61	1140.81	132.536	18.1044	2.77682	0.503525	0.136925	0.0103	0	0	0	131.909	68.4326	25.8098	6.43783	1.42342	0.330875	0.112525	0.009825	0	0	0	1.0885	0.39365	0.417625	0.18435	0.05845	0.01735	0.007375	0.00075	0	0	0	1979.75	1963.75	14	1.75	0.25	0	0
RIL178	109	20.5	2	41.2	149.85	34.125	0.32585	2618	1014.75	930.191	814.978	101.524	8.9119	1.61612	0.4771	0.062	0	0	0	0	96.4374	51.9743	19.0731	3.1538	0.83865	0.319	0.0504	0	0	0	0	0.81675	0.3161	0.296775	0.089925	0.034825	0.017025	0.00325	0	0	0	0	1216.25	1204.75	10.5	0.75	0.25	0	0
RIL181	110	23.25	2	39.675	124.275	24.825	0.312025	1774.25	623	690.27	615.21	64.6743	5.99915	1.16948	0.359625	0.129575	0.0327	0	0	0	67.7344	38.0403	12.1455	2.1379	0.623475	0.240725	0.11385	0.033475	0	0	0	0.548	0.225375	0.1888	0.061375	0.026625	0.01285	0.007975	0.002725	0	0	0	991	984	6.5	0.25	0.25	0	0
RIL182	111	24.5	2	50.925	208.975	43.525	0.31925	4597	1822	1341.56	1182.83	140.507	12.1926	1.59557	0.38515	0.0963	0.026925	0	0	0	133.147	71.4549	26.6543	4.2929	0.820425	0.257775	0.078875	0.026275	0	0	0	1.08075	0.414725	0.4184	0.12175	0.033725	0.013775	0.00515	0.00205	0	0	0	1976.75	1958.5	15.5	1.5	0	0.75	0
RIL185	112	26.75	1.25	54.55	251.2	52.9	0.28285	6607.75	2973.5	1722.75	1591.78	116.47	8.01408	0.791575	0.226625	0.042725	0	0.068075	0.0103	0	153.633	92.3666	22.0085	2.799	0.41195	0.153975	0.0359	0	0.080975	0.01435	0	1.09625	0.51295	0.34485	0.078725	0.017125	0.008375	0.0024	0	0.007675	0.0016	0	2081.75	2072	9.25	0.25	0	0	0.25
RIL187	113	27.25	1.75	61.85	281.725	73.65	0.354975	8035.5	2935.5	1902.85	1605.02	246.24	35.9322	6.4759	1.59952	0.615875	0.1105	0.18045	0.03035	0.06065	209.826	97.7826	48.3428	12.8304	3.35328	1.0708	0.5231	0.116325	0.208075	0.038675	0.0936	1.85475	0.57335	0.788725	0.369275	0.138875	0.057225	0.035425	0.00975	0.019125	0.003925	0.0115	3032.75	3012.5	18.75	1.5	0	0	0
RIL188B	114	25.25	1.5	50.4	245.3	59.4	0.33175	6268.75	2475.75	1664.28	1450.71	181.121	21.2622	4.2997	1.24957	0.251175	0.076925	0	0	0	172.948	88.7147	35.1554	7.52365	2.24158	0.83235	0.20745	0.0776	0	0	0	1.46775	0.51775	0.566325	0.214475	0.093575	0.044275	0.013675	0.00625	0	0	0	2232.5	2212.5	18.5	1	0	0.25	0
RIL189	115	23.75	1.5	56.175	224.825	53.2	0.349625	5320.75	1905.75	1435.27	1224.1	176.181	22.3588	4.2343	1.28603	0.540825	0.10245	0	0	0	155.019	76.0317	34.1645	7.96637	2.1872	0.872275	0.450975	0.101725	0	0	0	1.33975	0.4529	0.5498	0.2287	0.0904	0.04725	0.029975	0.00805	0	0	0	2338.75	2321	15.5	1.75	0.5	0	0
RIL190	116	23.75	1.5	41.75	167.675	49.05	0.335125	4712.25	1889.25	1308.4	1131.25	156.651	14.0339	2.07645	0.504775	0.15405	0.0248	0	0.026125	0	134.874	69.7531	29.6159	4.96707	1.07492	0.341625	0.13165	0.026025	0	0.033275	0	1.12425	0.413	0.4643	0.141675	0.044525	0.01845	0.008975	0.002175	0	0.003375	0	1685.25	1672	13.25	0	0	0	0
RIL191	117	22.75	2	44.2	160.875	38.65	0.27825	3569.25	1499.5	1094.14	1010.49	73.9815	4.61085	0.5267	0.19795	0.077325	0.052775	0	0	0	96.202	59.3462	13.6188	1.61868	0.276375	0.136175	0.065375	0.051325	0	0	0	0.67825	0.336825	0.2073	0.045775	0.0116	0.007475	0.0044	0.003975	0	0	0	1540.75	1533	6	1.25	0.25	0	0.25
RIL192	118	24	2	45.35	196.375	50.075	0.336725	4832	1863	1392.12	1203.39	162.229	17.9723	2.94488	0.702325	0.1253	0	0.021625	0	0	146.144	74.755	31.0552	6.39213	1.5385	0.469025	0.10175	0	0.025425	0	0	1.24825	0.44505	0.4932	0.183225	0.0643	0.025	0.0066	0	0.002375	0	0	1869.5	1849	19	1.5	0	0	0
RIL193	119	21.25	2	37.1	124.75	27.25	0.310075	2070.5	794	780.166	688.435	82.8421	5.8719	0.6513	0.3128	0.027975	0.034825	0.01715	0	0	77.2832	42.1635	15.6336	2.06795	0.330925	0.218375	0.024225	0.03505	0.019525	0	0	0.63075	0.247	0.244375	0.058625	0.013425	0.012175	0.001675	0.002825	0.001775	0	0	1051.25	1043.75	7	0.5	0	0	0
RIL194	120	20.75	1.75	50.475	181.35	42.825	0.301075	4541.5	1862.25	1294.66	1169.62	106.497	11.3956	2.05295	0.631275	0.291475	0.1	0	0.070675	0	120.279	68.1243	20.2261	4.06428	1.08342	0.421775	0.239175	0.100925	0	0.09305	0	0.92225	0.3812	0.31835	0.1168	0.04575	0.0225	0.01565	0.008125	0	0.009775	0	1780.5	1770.75	9.5	0.25	0	0	0
RIL195	121	27	1.5	66.6	349.8	60.65	0.3548	6232	2178	1562.57	1326.83	195.456	28.8956	5.28095	1.29785	0.3563	0.188125	0.06775	0	0.0103	174.208	83.0493	38.2353	10.3427	2.75212	0.87835	0.2946	0.186675	0.079	0	0.015175	1.548	0.497425	0.621025	0.29855	0.1148	0.04745	0.019425	0.014775	0.007325	0	0.001775	2106.25	2085.75	18	2	0.25	0.25	0
RIL196	122	25.25	1	56.575	301.85	62.175	0.361925	5464	1844.5	1552.05	1306.74	204.513	28.1012	5.68233	1.58997	0.61075	0.056425	0	0	0.021625	177.815	85.6564	39.6241	10.0336	2.95567	1.07035	0.513525	0.0562	0	0	0.03295	1.6315	0.5346	0.637775	0.28875	0.12305	0.0575	0.034475	0.00445	0	0	0.004	2117.75	2096	19.75	1.75	0.25	0	0
RIL197	123	22.75	2	44.675	160.95	33.65	0.291	3731.25	1526	1114.51	1020.31	81.6946	7.56247	0.84065	0.06175	0.0384	0.08755	0	0	0	100.97	59.9153	15.4079	2.66948	0.4287	0.041575	0.031525	0.0877	0	0	0	0.74525	0.3369	0.24065	0.075875	0.0175	0.00225	0.002075	0.007	0	0	0	1746.25	1738.5	7.25	0.25	0.25	0	0
RIL198	124	25.5	2	42.75	189.45	44.85	0.34385	4214.75	1494.75	1283.07	1115.85	139.265	19.7445	3.65615	0.986825	0.191775	0.127425	0.0401	0	0	139.057	70.7232	27.3848	7.05077	1.90915	0.66235	0.16435	0.125625	0.0466	0	0	1.217	0.425325	0.447525	0.202975	0.079825	0.03545	0.01125	0.009875	0.004325	0	0	1577	1557.5	18.25	1	0.25	0	0
RIL199	125	25.75	1.5	55.025	237.7	64.875	0.3188	7654	2971.75	1826.27	1624.25	171.64	21.0209	2.845	0.667325	0.337125	0.070175	0	0	0	182.107	98.0348	33.2131	7.4117	1.47065	0.448375	0.286025	0.06865	0	0	0	1.4525	0.56705	0.534	0.210475	0.0608	0.02405	0.0194	0.00535	0	0	0	2593.25	2575.5	14.5	2.75	0.25	0	0
RIL201	126	21.25	2	51.35	212.8	52.575	0.34695	4708.5	1664.25	1324.84	1132.36	169.124	14.9336	2.71287	0.462225	0.14295	0.045125	0	0	0	143.132	72.7788	32.1813	5.2816	1.40042	0.312	0.121225	0.045225	0	0	0	1.25925	0.44555	0.50765	0.1505	0.057825	0.016825	0.0082	0.003625	0	0	0	1588.25	1576.5	11.25	0.25	0	0.25	0
RIL203	127	20	2	41.825	139.175	30.6	0.326625	2885	1006.75	833.864	721.692	100.074	7.8681	1.4866	0.292875	0.035075	0	0	0	0	87.0852	45.4319	18.7737	2.81198	0.765775	0.19775	0.030625	0	0	0	0	0.7295	0.2721	0.291225	0.081	0.031575	0.010625	0.002125	0	0	0	0	1147.5	1139.25	7.5	0.5	0	0	0
RIL204	128	21.5	1.75	44.675	168.175	34.1	0.273025	3205	1424.5	1008.44	938.453	63.4468	2.74175	0.2261	0.1807	0.05135	0	0	0	0	85.5729	53.8654	11.4316	0.95755	0.1205	0.1242	0.045975	0	0	0	0	0.57925	0.296975	0.169675	0.026925	0.005125	0.006825	0.0033	0	0	0	0	1483.5	1476.5	6	0.75	0.25	0	0
RIL205	129	27	1.5	65.475	380.925	85.35	0.37855	8437.25	3127.75	1971.9	1629.79	271.358	48.1602	11.1768	3.56543	1.4782	0.197225	0.085025	0.095575	0.101825	234.036	103.203	53.575	17.2518	5.80952	2.3948	1.24265	0.190925	0.097775	0.12265	0.200975	2.216	0.62345	0.87965	0.49825	0.2415	0.128425	0.083325	0.0147	0.008975	0.012525	0.0318	2492.5	2469.5	21.25	1.25	0.25	0.25	0
RIL206	130	23	2	54.975	245.7	52.75	0.2882	5606.5	2369	1530.94	1379.68	130.63	11.9859	2.44868	0.7921	0.410725	0.03165	0	0	0	142.271	80.3052	24.7766	4.30347	1.26937	0.53035	0.34245	0.0317	0	0	0	1.07975	0.4514	0.389375	0.124575	0.05265	0.028325	0.022775	0.002525	0	0	0	2166.75	2151.75	12.75	1.25	0.25	0	0
RIL207	131	25	1	54.775	305.75	72.25	0.340975	6309	2488.75	1686.68	1457.02	181.747	30.0141	7.56787	2.99392	0.980425	0.76455	0.06455	0.020575	0.029	180.969	88.4796	35.3233	10.7633	3.9977	2.00798	0.82445	0.76145	0.07795	0.027325	0.0469	1.62875	0.516875	0.570025	0.31115	0.169	0.1075	0.055325	0.060425	0.0075	0.0029	0.006025	2374.25	2355.75	17	1	0	0.5	0
RIL208	132	24.25	1.5	51	193.675	41.1	0.352075	4368	1591.75	1242.08	1062.06	151.758	19.0086	3.84785	0.790325	0.27365	0.0364	0.03615	0	0	135.294	67.1039	29.2857	6.78573	1.99197	0.5406	0.224	0.03565	0.0403	0	0	1.19175	0.403825	0.469	0.195275	0.082475	0.029575	0.014625	0.002775	0.003575	0	0	1613	1594.5	16.25	1.5	0.75	0	0
RIL209	133	23.25	1.5	45.325	194.625	43.875	0.3255	4240.75	1551.5	1246.27	1083.91	137.746	15.742	3.2296	0.8353	0.32135	0	0.12715	0.03035	0.0285	128.24	66.4715	25.9863	5.59618	1.6811	0.568875	0.268	0	0.151575	0.039225	0.04085	1.06775	0.39195	0.406625	0.16035	0.07	0.030975	0.017825	0	0.0144	0.004025	0.00465	1829.5	1816	12.75	0.5	0.25	0	0
RIL210	134	20.5	2	53.8	170.775	42.5	0.34825	3446.25	1238	1086.38	915.873	153.05	12.2769	1.705	0.381725	0.059075	0.0285	0	0	0	116.888	58.1813	28.7	4.32805	0.8762	0.256675	0.049075	0.028775	0	0	0	1.00875	0.35235	0.4452	0.12295	0.036	0.0138	0.00325	0.002325	0	0	0	1354.5	1341.25	12	1	0	0.25	0
RIL211	135	21.5	2	53.525	145.85	28.8	0.349825	2276.5	759.25	797.653	678.979	106.725	8.37957	1.28463	0.2728	0.063325	0.003125	0.10975	0	0	87.5599	45.1254	20.108	2.983	0.6595	0.1808	0.0515	0.003	0.124775	0	0	0.76675	0.28445	0.31405	0.085525	0.02705	0.00955	0.00335	0.000225	0.0113	0	0	1013	1002.75	9.5	0.25	0	0	0
RIL92A	136	23.25	2.25	62.575	230.05	56.9	0.362025	5169	1809.5	1445.68	1204.2	201.345	26.3473	5.69487	2.2545	0.613825	0.10815	0.010025	0.013725	0	166.392	77.7088	38.8286	9.45763	2.9742	1.53407	0.522925	0.1088	0.011575	0.0183	0	1.53125	0.47905	0.621875	0.273775	0.12425	0.083425	0.035525	0.00875	0.001075	0.00195	0	2014	1992.25	20.5	1	0.25	0	0
Molise	137	23.25	1.75	60.875	212.925	46.675	0.326275	4546.25	1666.75	1317.24	1153.97	143.258	13.6732	2.04183	0.42105	0.1082	0.01345	0.00685	0	0	135.382	72.3636	27.2618	4.82525	1.05143	0.2803	0.087725	0.013925	0.00765	0	0	1.11925	0.434	0.4306	0.137025	0.043275	0.014925	0.00565	0.00115	0.000675	0	0	1860.25	1839.75	18.5	2	0	0	0
Simeto	138	22.75	1	39.425	162.575	33.875	0.3138	3270	1262.25	1096.25	977.361	104.602	8.75608	1.442	0.5126	0.22205	0.0509	0.0235	0	0	108.125	60.4948	19.7054	3.07145	0.75295	0.344925	0.1859	0.050175	0.0266	0	0	0.84975	0.359	0.30775	0.08675	0.0315	0.01855	0.0124	0.00395	0.0024	0	0	1513.75	1501.5	10.5	1	0.5	0.25	0
Mean		24.692	1.5779	53.445	221.672	51.5295	0.304948	5352.22	2308.16	1355.01	1213.68	121.423	12.1524	2.07658	0.587157	0.205761	0.0670938	0.0261953	0.00845453	0.00415815	128.203	70.9996	23.1996	4.30923	1.07789	0.394875	0.173125	0.0671187	0.0305072	0.0111545	0.00665036	0.991139	0.398514	0.36752	0.123125	0.0447649	0.0212011	0.0116246	0.00535399	0.00283225	0.00117246	0.000860507	1990.12	1977.46	11.3967	0.887681	0.153986	0.076087	0.0271739
Standard deviation		2.72279	0.384224	8.14951	56.5479	18.2929	0.0277445	2352.46	1152.28	395.436	354.575	48.0846	8.60356	2.06778	0.696113	0.295863	0.100577	0.0473721	0.0202984	0.0138003	40.2704	19.8978	9.55339	3.08473	1.0794	0.469986	0.249346	0.100479	0.0552465	0.0267538	0.0235806	0.361806	0.110018	0.157848	0.0891703	0.0450903	0.0253384	0.0167702	0.00800567	0.00513838	0.00281144	0.00334229	597.469	595.06	4.36159	0.688853	0.205585	0.140414	0.0780977
Min		19.75	1	36.175	120.95	13.525	0.2264	994	374.5	377.218	343.083	30.0449	0.98655	0.1338	0.014775	0	0	0	0	0	33.8834	20.0896	5.3869	0.35165	0.06775	0.0106	0	0	0	0	0	0.2515	0.11465	0.079625	0.010075	0.002725	0.0006	0	0	0	0	0	679	674	3.25	0	0	0	0
Max		34	2.25	71.175	380.925	106.575	0.37855	12172.8	5753.25	2439.36	2223.64	271.358	48.1602	11.7801	4.82982	2.15772	0.76455	0.2828	0.098925	0.101825	234.036	125.814	53.575	17.2518	6.17213	3.26587	1.8249	0.76145	0.3307	0.1308	0.200975	2.216	0.680825	0.87965	0.49825	0.25885	0.176325	0.12315	0.060425	0.030825	0.013775	0.0318	3303.75	3289	23	3.25	1	0.75	0.25
Range		14.25	1.25	35	259.975	93.05	0.15215	11178.8	5378.75	2062.14	1880.56	241.313	47.1736	11.6463	4.81505	2.15772	0.76455	0.2828	0.098925	0.101825	200.153	105.724	48.1881	16.9002	6.10438	3.25527	1.8249	0.76145	0.3307	0.1308	0.200975	1.9645	0.566175	0.800025	0.488175	0.256125	0.175725	0.12315	0.060425	0.030825	0.013775	0.0318	2624.75	2615	19.75	3.25	1	0.75	0.25
CV(%)		11.027	24.3504	15.2484	25.5097	35.4998	9.09811	43.953	49.9222	29.1833	29.2149	39.6009	70.7973	99.5763	118.557	143.79	149.905	180.842	240.089	331.884	31.4113	28.0252	41.1791	71.5844	100.14	119.022	144.026	149.704	181.093	239.847	354.576	36.5041	27.607	42.9496	72.4226	100.727	119.515	144.264	149.527	181.424	239.789	388.409	30.0218	30.0921	38.2705	77.6014	133.509	184.544	287.4
SE		0.231779	0.0327074	0.693732	4.81368	1.55719	0.00236177	200.255	98.0888	33.6618	30.1834	4.09323	0.732383	0.176022	0.0592571	0.0251856	0.00856167	0.00403258	0.00172791	0.00117476	3.42805	1.69381	0.813238	0.26259	0.0918845	0.0400079	0.0212257	0.00855338	0.0047029	0.00227744	0.00200732	0.030799	0.00936536	0.013437	0.00759068	0.00383834	0.00215695	0.00142758	0.000681488	0.000437408	0.000239325	0.000284514	50.86	50.6548	0.371283	0.0586391	0.0175005	0.0119528	0.00664812
[truncated: 2 more columns]
