# Supplementary material for: Mapping QTL for Root and Shoot Morphological Traits in a Durum Wheat × T. dicoccum Segregating Population at Seedling Stage
Source: Int J Genomics. 2017 Aug 6;2017:6876393. doi: 10.1155/2017/6876393 (PMC5563412; doi:10.1155/2017/6876393)
Supplement: Supplementary file 3 [file 6876393.f3.xlsx]

## Sheet: Foglio1
Table S2: ANOVA. Analysis of variance (mean square values) for shoot and root traits of 138 durum wheat genotypes.
Source of variation	DAS†	Shoots	PH	LDW	RDW	D	F	C	L	L1	L2	L3	L4	L5	L6	L7	L8	L9	L10	SA	SA1	SA2	SA3	SA4	SA5	SA6	SA7	SA8	SA9	SA10	V	V1	V2	V3	V4	V5	V6	V7	V8	V9	V10	T	T1	T2	T3	T4	T5	T6	T7
Genotype	29.6543	0.59	265.658	12790.7	1338.52	0.00307903	22136.3	53110.2	62547.9	502894	9248.52	296.085	17.1029	1.93829	0.350141	0.0404628	0.00897647	0.0016481	0.000761788	6486.83	1583.69	365.069	38.0624	4.66041	0.883547	0.248693	0.0403845	0.0122087	0.00286307	0.00222418	0.523615	0.0484159	0.0996645	0.0318054	0.00813255	0.00256815	0.00112496	0.000256363	0.000105612	3.16167e-05	4.46835e-05	14278.8	14163.8	76.0939	1.89807	0.16906	0.0788639	0.024397	0.0087935
Error	9.26329	0.23	19.3119	1636.48	539.719	0.00229657	7310.56	24035	19801	186195	2796.5	111.782	7.77304	1.18351	0.244324	0.0320604	0.00810753	0.00144865	0.000809263	1422.03	481.383	111.67	14.4281	2.12558	0.541593	0.172984	0.0319451	0.0110503	0.0025378	0.00234297	0.12177	0.0118345	0.0308918	0.0121057	0.00372335	0.00158048	0.000779874	0.000202506	9.58024e-05	2.82504e-05	4.6635e-05	4495.35	4492.12	44.9112	1.60145	0.170894	0.0772947	0.0271739	0.00905797
F	3.2	2.61	13.76	7.82	2.48	1.34	3.03	2.21	3.1	2.7	3.31	2.65	2.2	1.64	1.43	1.26	1.11	1.14	0.94	4.56	3.29	3.27	2.64	2.19	1.63	1.44	1.26	1.11	1.13	0.95	4.3	4.09	3.23	2.63	2.18	1.63	1.44	1.27	1.1	1.12	0.96	3.18	3.15	1.69	1.19	0.99	1.02	0.9	0.97
p<F	0.001	0.001	0.001	0.001	0.0001	0.01	0.001	0.0001	0.001	0.0001	0.001	0.001	0.001	0.001	0.005	0.05	ns	ns	ns	0.001	0.001	0.001	0.001	0.001	0.001	0.005	0.05	ns	ns	ns	0.001	0.001	0.001	0.001	0.001	0.001	0.005	0.05	ns	ns	ns	0.001	0.001	0.001	ns	ns	ns	ns	ns
LSD	4.22	0.66	3.09	56.06	32.2	0.07	3747.18	2148.58	616.7	598.02	73.29	14.65	3.86	1.51	0.69	0.25	¨¨¨¨	¨¨¨¨	¨¨¨¨	52.26	30.41	14.65	5.26	2.02	1.02	0.58	0.25	¨¨¨¨	¨¨¨¨	¨¨¨¨	0.48	0.15	0.24	0.15	0.09	0.06	0.04	0.02	¨¨¨¨	¨¨¨¨	¨¨¨¨	929.2	928.87	9.29	¨¨¨¨	¨¨¨¨	¨¨¨¨	¨¨¨¨	¨¨¨¨
Mean	24.69	1.58	53.45	221.67	51.53	0.3	5352.22	2308.16	1355.01	1213.68	121.423	12.1524	2.07658	0.587157	0.205761	0.0670938	0.0261953	0.00845453	0.00415815	128.2	70.9996	23.1996	4.30923	1.07789	0.394875	0.173125	0.0671187	0.0305072	0.0111545	0.00665036	0.99	0.398514	0.36752	0.123125	0.0447649	0.0212011	0.0116246	0.00535399	0.00283225	0.00117246	0.000860507	1990.12	1977.46	11.3967	0.887681	0.153986	0.076087	0.0271739	0.00905797
%CV	11.03	24.35	15.25	25.51	35.5	9.1	43.95	49.92	29.18	29.2149	39.6009	70.7973	99.5763	118.557	143.79	149.905	180.842	240.089	331.884	31.41	28.0252	41.1791	71.5844	100.14	119.022	144.026	149.704	181.093	239.847	354.576	36.5	27.607	42.9496	72.4226	100.727	119.515	144.264	149.527	181.424	239.789	388.409	30.02	30.0921	38.2705	77.6014	133.509	184.544	287.4	517.631
†DAS, days after sowing (d); Shoots, number of shoots per plant; PH, plant height (cm); LDW, leaf dry weight (mg), RDW, root leaf dry weight (mg), D, root diameter (mm); F, number of forks; C, number of crossings; L, root length (cm); L1-L10; , root length in ten diameter classes (0.0¸4.5 mm); SA, root surface area (cm2); SA1-SA10, , root surface area in ten diameter classes (0.0¸4.5 mm); V, root…
[truncated: 1 more columns]
