# Supplementary material for: Mapping QTL for Root and Shoot Morphological Traits in a Durum Wheat × T. dicoccum Segregating Population at Seedling Stage
Source: Int J Genomics. 2017 Aug 6;2017:6876393. doi: 10.1155/2017/6876393 (PMC5563412; doi:10.1155/2017/6876393)
Supplement: Supplementary file 4 [file 6876393.f4.xls]

## Sheet: Table
Table correlations1. Simple Pearson's correlation coefficient (r) of shoot and root traits of 138 durum wheat genotypes.
Character	DAS†	Shoots	PH	LDW	RDW	D	F	C	L	L1	L2	L3	L4	L5	L6	L7	L8	L9	L10	SA	SA1	SA2	SA3	SA4	SA5	SA6	SA7	SA8	SA9	SA10	V	V1	V2	V3	V4	V5	V6	V7	V8	V9	V10	T	T1	T2	T3	T4	T5	T6	T7
DAS	1	-0.55**	0.56**	0.54**	0.38**	-0.25**	0.45**	0.49**	0.44**	0.47**	0.09	0.12	0.1	0.061353	0.07	0.05	0.07	0.08	0.05	0.32**	0.417379	0.1	0.115517	0.1	0.06	0.07	0.05	0.07	0.08	0.06	0.20*	0.35**	0.11	0.11	0.1	0.06	0.07	0.04	0.07	0.08	0.07	0.53**	0.53**	0.1	0.11	-0.01	0.06	-0.07	0.04
C	-0.549902	1	-0.19	-0.29**	-0.15	0.36**	-0.21*	-0.25**	-0.18	-0.23*	0.16	0.13	0.11	0.09	0.06	0.04	0.05	-0.09	-0.05	-0.05	-0.17	0.15	0.13	0.1	0.09	0.07	0.04	0.044444	-0.09	-0.05	0.05	-0.1	0.15	0.13	0.1	0.09	0.07	0.04	0.04	-0.09	-0.04	-0.26**	-0.26**	0.1	0.06	0.03	-0.06	0.08	0.01
SH			1	0.80**	0.59**	-0.03	0.62**	0.63**	0.62**	0.62**	0.39**	0.33**	0.27**	0.23**	0.24**	0.20*	0.14	0.15	0.18*	0.54**	0.600174	0.39**	0.33**	0.27**	0.23**	0.24**	0.20*	0.14	0.14	0.18	0.45**	0.56**	0.39**	0.33**	0.27**	0.23**	0.24**	0.20*	0.14	0.14	0.18*	0.67**	0.67**	0.30**	0.12	0.06	0.11	0.04	-0.03
LDW				1	0.81**	0.06	0.82**	0.79**	0.83**	0.82**	0.59**	0.55**	0.49**	0.41**	0.37**	0.29**	0.23**	0.21*	0.27**	0.78**	0.819331	0.59**	0.55**	0.49**	0.41**	0.37**	0.29**	0.23**	0.21*	0.28**	0.68**	0.79**	0.59**	0.55**	0.49**	0.41**	0.37**	0.29**	0.23**	0.20*	0.29**	0.81**	0.81**	0.50**	0.21*	0.15	0.19*	-0.06	0
RDW					1	0.14	0.93**	0.88**	0.93**	0.91**	0.73**	0.67**	0.58**	0.47**	0.43**	0.35**	0.29**	0.20*	0.19*	0.90**	0.919131	0.74**	0.66**	0.58**	0.47**	0.43**	0.35**	0.29**	0.20*	0.20*	0.81**	0.90**	0.74**	0.66**	0.58**	0.47**	0.43**	0.35**	0.29**	0.20*	0.20*	0.87**	0.87**	0.59**	0.31**	0.17	0.13	-0.05	0.07
D						1	0	-0.17	0.08	-0.03	0.71**	0.72**	0.68**	0.62**	0.52**	0.42**	0.35**	0.20*	0.30**	0.39**	0.120359	0.71**	0.72**	0.68**	0.62**	0.52**	0.42**	0.35**	0.20*	0.30**	0.61**	0.28**	0.71**	0.72**	0.68**	0.62**	0.52**	0.42**	0.34**	0.20*	0.30**	-0.07	-0.07	0.67**	0.47**	0.19*	0.16	-0.06	0.18*
F							1	0.98**	0.98**	0.98**	0.65**	0.58**	0.49**	0.36**	0.33**	0.24**	0.22*	0.14	0.11	0.90**	0.962462	0.65**	0.58**	0.49**	0.36**	0.33**	0.24**	0.22*	0.14	0.12	0.75**	0.92**	0.66**	0.57**	0.48**	0.36**	0.33**	0.24**	0.21*	0.14	0.12	0.93**	0.93**	0.51**	0.20*	0.12	0.12	0	0.06
C								1	0.93**	0.95**	0.50**	0.42**	0.33**	0.23**	0.21**	0.15	0.13	0.08	0.04	0.79**	0.909375	0.51**	0.42**	0.33**	0.23**	0.22**	0.153156	0.13	0.08	0.04	0.61**	0.83**	0.51**	0.41**	0.33**	0.22**	0.22*	0.15	0.13	0.08	0.05	0.91**	0.91**	0.35**	0.09	0.07	0.11	0	0.01
L									1	0.99**	0.72**	0.64**	0.52**	0.39**	0.35**	0.27**	0.22*	0.15	0.15	0.95**	0.996695	0.73**	0.63**	0.52**	0.39**	0.35**	0.27**	0.22*	0.15	0.16	0.82**	0.97**	0.73**	0.63**	0.52**	0.39**	0.35**	0.26**	0.22*	0.15	0.16	0.93**	0.93**	0.58**	0.26**	0.13	0.13	0.02	0.08
L1										1	0.64**	0.55**	0.44**	0.31**	0.28**	0.22*	0.169886	0.12	0.11	0.90**	0.98663	0.64**	0.54**	0.44**	0.31**	0.28**	0.21*	0.170289	0.12	0.12	0.75**	0.94**	0.64**	0.54**	0.43**	0.31**	0.28**	0.21*	0.17	0.12	0.12	0.94**	0.94**	0.50**	0.20*	0.1	0.12	0.03	0.06
L2											1	0.94**	0.83**	0.69**	0.60**	0.45**	0.39**	0.26**	0.34**	0.90**	0.743678	1.00**	0.93**	0.83**	0.69**	0.60**	0.45**	0.38**	0.25**	0.34**	0.97**	0.84**	1.00**	0.93**	0.82**	0.69**	0.60**	0.45**	0.38**	0.25**	0.34**	0.58**	0.58**	0.86**	0.51**	0.23**	0.20*	-0.05	0.18*
L3												1	0.96**	0.85**	0.76**	0.59**	0.50**	0.35**	0.44**	0.84**	0.648808	0.94**	1.00**	0.95**	0.85**	0.76**	0.59**	0.50**	0.35**	0.45**	0.94**	0.74**	0.95**	1.00**	0.95**	0.85**	0.76**	0.59**	0.50**	0.35**	0.45**	0.53**	0.53**	0.84**	0.53**	0.26**	0.18*	-0.04	0.21*
L4													1	0.95**	0.88**	0.67**	0.59**	0.44**	0.46**	0.73**	0.530264	0.84**	0.96**	1.00**	0.95**	0.88**	0.67**	0.59**	0.44**	0.47**	0.85**	0.62**	0.85**	0.96**	1.00**	0.95**	0.88**	0.67**	0.58**	0.44**	0.47**	0.45**	0.45**	0.77**	0.49**	0.25**	0.14	-0.08	0.24**
L5														1	0.93**	0.74**	0.65**	0.51**	0.47**	0.59**	0.391483	0.70**	0.85**	0.95**	1.00**	0.93**	0.74**	0.65**	0.51**	0.48**	0.72**	0.47**	0.71**	0.86**	0.95**	1.00**	0.93**	0.73**	0.64**	0.51**	0.48**	0.33**	0.33**	0.67**	0.45**	0.21*	0.14	-0.1	0.27**
L6															1	0.76**	0.68**	0.55**	0.53**	0.52**	0.342653	0.61**	0.76**	0.88**	0.93**	1.00**	0.75**	0.67**	0.55**	0.53**	0.63**	0.40**	0.62**	0.77**	0.88**	0.94**	1.00**	0.75**	0.67**	0.54**	0.52**	0.31**	0.31**	0.57**	0.37**	0.23**	0.08	-0.06	0.27**
L7																1	0.60**	0.43**	0.39**	0.40**	0.262315	0.46**	0.59**	0.68**	0.74**	0.76**	1.00**	0.60**	0.43**	0.36**	0.49**	0.31**	0.47**	0.59**	0.68**	0.74**	0.76**	1.00**	0.60**	0.43**	0.33**	0.27**	0.26**	0.45**	0.29**	0.21*	0.21*	-0.02	0.15
L8																	1	0.62**	0.46**	0.33**	0.20901	0.40**	0.51**	0.59**	0.65**	0.68**	0.60**	1.00**	0.62**	0.42**	0.41**	0.25**	0.40**	0.51**	0.59**	0.65**	0.68**	0.60**	1.00**	0.62**	0.38**	0.23**	0.22**	0.37**	0.21*	0.16	-0.01	-0.1	0.12
L9																		1	0.47**	0.22**	0.140897	0.26**	0.36**	0.44**	0.51**	0.55**	0.43**	0.63**	1.00**	0.48**	0.28**	0.16	0.27**	0.36**	0.45**	0.51**	0.55**	0.43**	0.63**	1.00**	0.48**	0.17	0.17	0.24**	0.13	0	-0.02	-0.09	0.05
L10																			1	0.27**	0.153268	0.34**	0.44**	0.46**	0.47**	0.53**	0.39**	0.46**	0.46**	0.99**	0.35**	0.20*	0.35**	0.45**	0.46**	0.46**	0.53**	0.39**	0.45**	0.45**	0.96**	0.11	0.11	0.28**	0.1	0.11	0.12	-0.11	0.02
SA																				1	0.954723	0.90**	0.84**	0.73**	0.59**	0.52**	0.40**	0.33**	0.22*	0.27**	0.96**	0.98**	0.91**	0.83**	0.72**	0.59**	0.52**	0.39**	0.33**	0.22*	0.28**	0.83**	0.83**	0.76**	0.40**	0.18*	0.17	0	0.15
SA1																					1	0.74**	0.64**	0.53**	0.39**	0.34**	0.26**	0.21*	0.14	0.16	0.84**	0.98**	0.74**	0.64**	0.52**	0.39**	0.34**	0.26**	0.21*	0.14	0.16	0.91**	0.91**	0.60**	0.27**	0.12	0.13	0.03	0.09
SA2																						1	0.94**	0.84**	0.70**	0.61**	0.46**	0.39**	0.26**	0.35**	0.98**	0.84**	1.00**	0.94**	0.83**	0.70**	0.61**	0.46**	0.39**	0.26**	0.35**	0.59**	0.58**	0.86**	0.51**	0.23**	0.20*	-0.05	0.18*
SA3																							1	0.96**	0.85**	0.76**	0.59**	0.50**	0.35**	0.45**	0.94**	0.74**	0.95**	1.00**	0.95**	0.85**	0.76**	0.59**	0.50**	0.35**	0.45**	0.53**	0.52**	0.84**	0.53**	0.26**	0.18*	-0.04	0.21*
SA4																								1	0.95**	0.88**	0.68**	0.59**	0.44**	0.47**	0.85**	0.61**	0.85**	0.96**	1.00**	0.95**	0.88**	0.67**	0.59**	0.44**	0.47**	0.45**	0.44**	0.77**	0.49**	0.25**	0.15	-0.08	0.25**
SA5																									1	0.94**	0.74**	0.65**	0.51**	0.47**	0.72**	0.47**	0.71**	0.85**	0.95**	1.00**	0.94**	0.73**	0.64**	0.51**	0.47**	0.33**	0.33**	0.67**	0.45**	0.21*	0.14	-0.1	0.27**
SA6																										1	0.75**	0.68**	0.55**	0.53**	0.64**	0.40**	0.62**	0.77**	0.88**	0.94**	1.00**	0.75**	0.67**	0.54**	0.52**	0.31**	0.31**	0.57**	0.37**	0.23**	0.08	-0.06	0.27**
SA7																											1	0.60**	0.43**	0.36**	0.49**	0.31**	0.47**	0.59**	0.68**	0.74**	0.75**	1.00**	0.60**	0.43**	0.33**	0.26**	0.26**	0.45**	0.29**	0.21*	0.21*	-0.02	0.15
SA8																												1	0.63**	0.42**	0.41**	0.25**	0.40**	0.51**	0.59**	0.65**	0.68**	0.60**	1.00**	0.63**	0.38**	0.23**	0.22*	0.37**	0.22*	0.16	-0.01	-0.09	0.13
SA9																													1	0.47**	0.28**	0.16	0.27**	0.35**	0.44**	0.51**	0.54**	0.43**	0.63**	1.00**	0.47**	0.17	0.17	0.24**	0.13	0	-0.02	-0.09	0.05
SA10																														1	0.36**	0.20*	0.36**	0.45**	0.47**	0.47**	0.53**	0.36**	0.42**	0.46**	0.99**	0.11	0.11	0.27**	0.09	0.1	0.13	-0.1	0.01
V																															1	0.91**	0.98**	0.94**	0.85**	0.72**	0.64**	0.49**	0.40**	0.27**	0.36**	0.69**	0.68**	0.85**	0.48**	0.21*	0.19*	-0.02	0.19*
V1																																1	0.83**	0.73**	0.61**	0.47**	0.40**	0.30**	0.25**	0.16	0.21*	0.85**	0.85**	0.69**	0.33**	0.15	0.15	0.03	0.11
V2																																	1	0.95**	0.84**	0.71**	0.62**	0.47**	0.40**	0.26**	0.35**	0.59**	0.59**	0.86**	0.52**	0.23**	0.20*	-0.05	0.19*
V3																																		1	0.96**	0.85**	0.77**	0.59**	0.50**	0.35**	0.46**	0.52**	0.52**	0.84**	0.53**	0.26**	0.18*	-0.05	0.21*
V4																																			1	0.95**	0.88**	0.68**	0.59**	0.44**	0.47**	0.45**	0.44**	0.76**	0.49**	0.25**	0.15	-0.08	0.25**
V5																																				1	0.94**	0.73**	0.65**	0.51**	0.47**	0.33**	0.33**	0.67**	0.45**	0.21*	0.14	-0.1	0.27**
V6																																					1	0.75**	0.67**	0.54**	0.52**	0.31**	0.31**	0.57**	0.37**	0.23**	0.08	-0.06	0.27**
V7																																						1	0.60**	0.43**	0.33**	0.26**	0.26**	0.45**	0.28**	0.21*	0.21*	-0.02	0.15
V8																																							1	0.63**	0.38**	0.22**	0.22*	0.37**	0.22*	0.15	-0.01	-0.09	0.13
V9																																								1	0.46**	0.17	0.17	0.24**	0.12	0	-0.02	-0.09	0.05
V10																																									1	0.11	0.11	0.27**	0.09	0.1	0.13	-0.09	0
T																																										1	1.00**	0.49**	0.27**	0.12	0.09	0.01	0.05
T1																																											1	0.49**	0.26**	0.12	0.09	0.01	0.05
T2																																												1	0.56**	0.23**	0.18*	-0.04	0.19*
T3																																													1	0.1	0.09	0.02	0.30**
T4																																														1	0.05	-0.04	-0.05
T5																																															1	-0.02	-0.04
T6																																																1	0.06
T7																																																	1
T8
†DAS, days after sowing (d); Shoots, number of shoots per plant; PH, plant height (cm); LDW, leaf dry weight (mg), RDW, root leaf dry weight (mg), D, root diameter (mm); F, number of forks; C, number of crossings; L, root length (cm); L1-L10; , root length in ten diameter classes (0.0¸4.5 mm); SA, root surface area (cm2); SA1-SA10, , root surface area in ten diameter classes (0.0¸4.5 mm); V, root…
* and** indicate a significant difference at p < 0.05 and p < 0.01 level of probability, respectively.
[truncated: 1 more columns]
